# Supplementary figures and images for: Development and Content Validity of the Statin Experience Assessment Questionnaire (SEAQ)©
Source: PubMed Central journal article supplement — Patient. 2016 Dec 15;10(3):321–34. doi: 10.1007/s40271-016-0211-y (PMC5422451; doi:10.1007/s40271-016-0211-y), 2016-12-15

Supplementary Fig. 1a

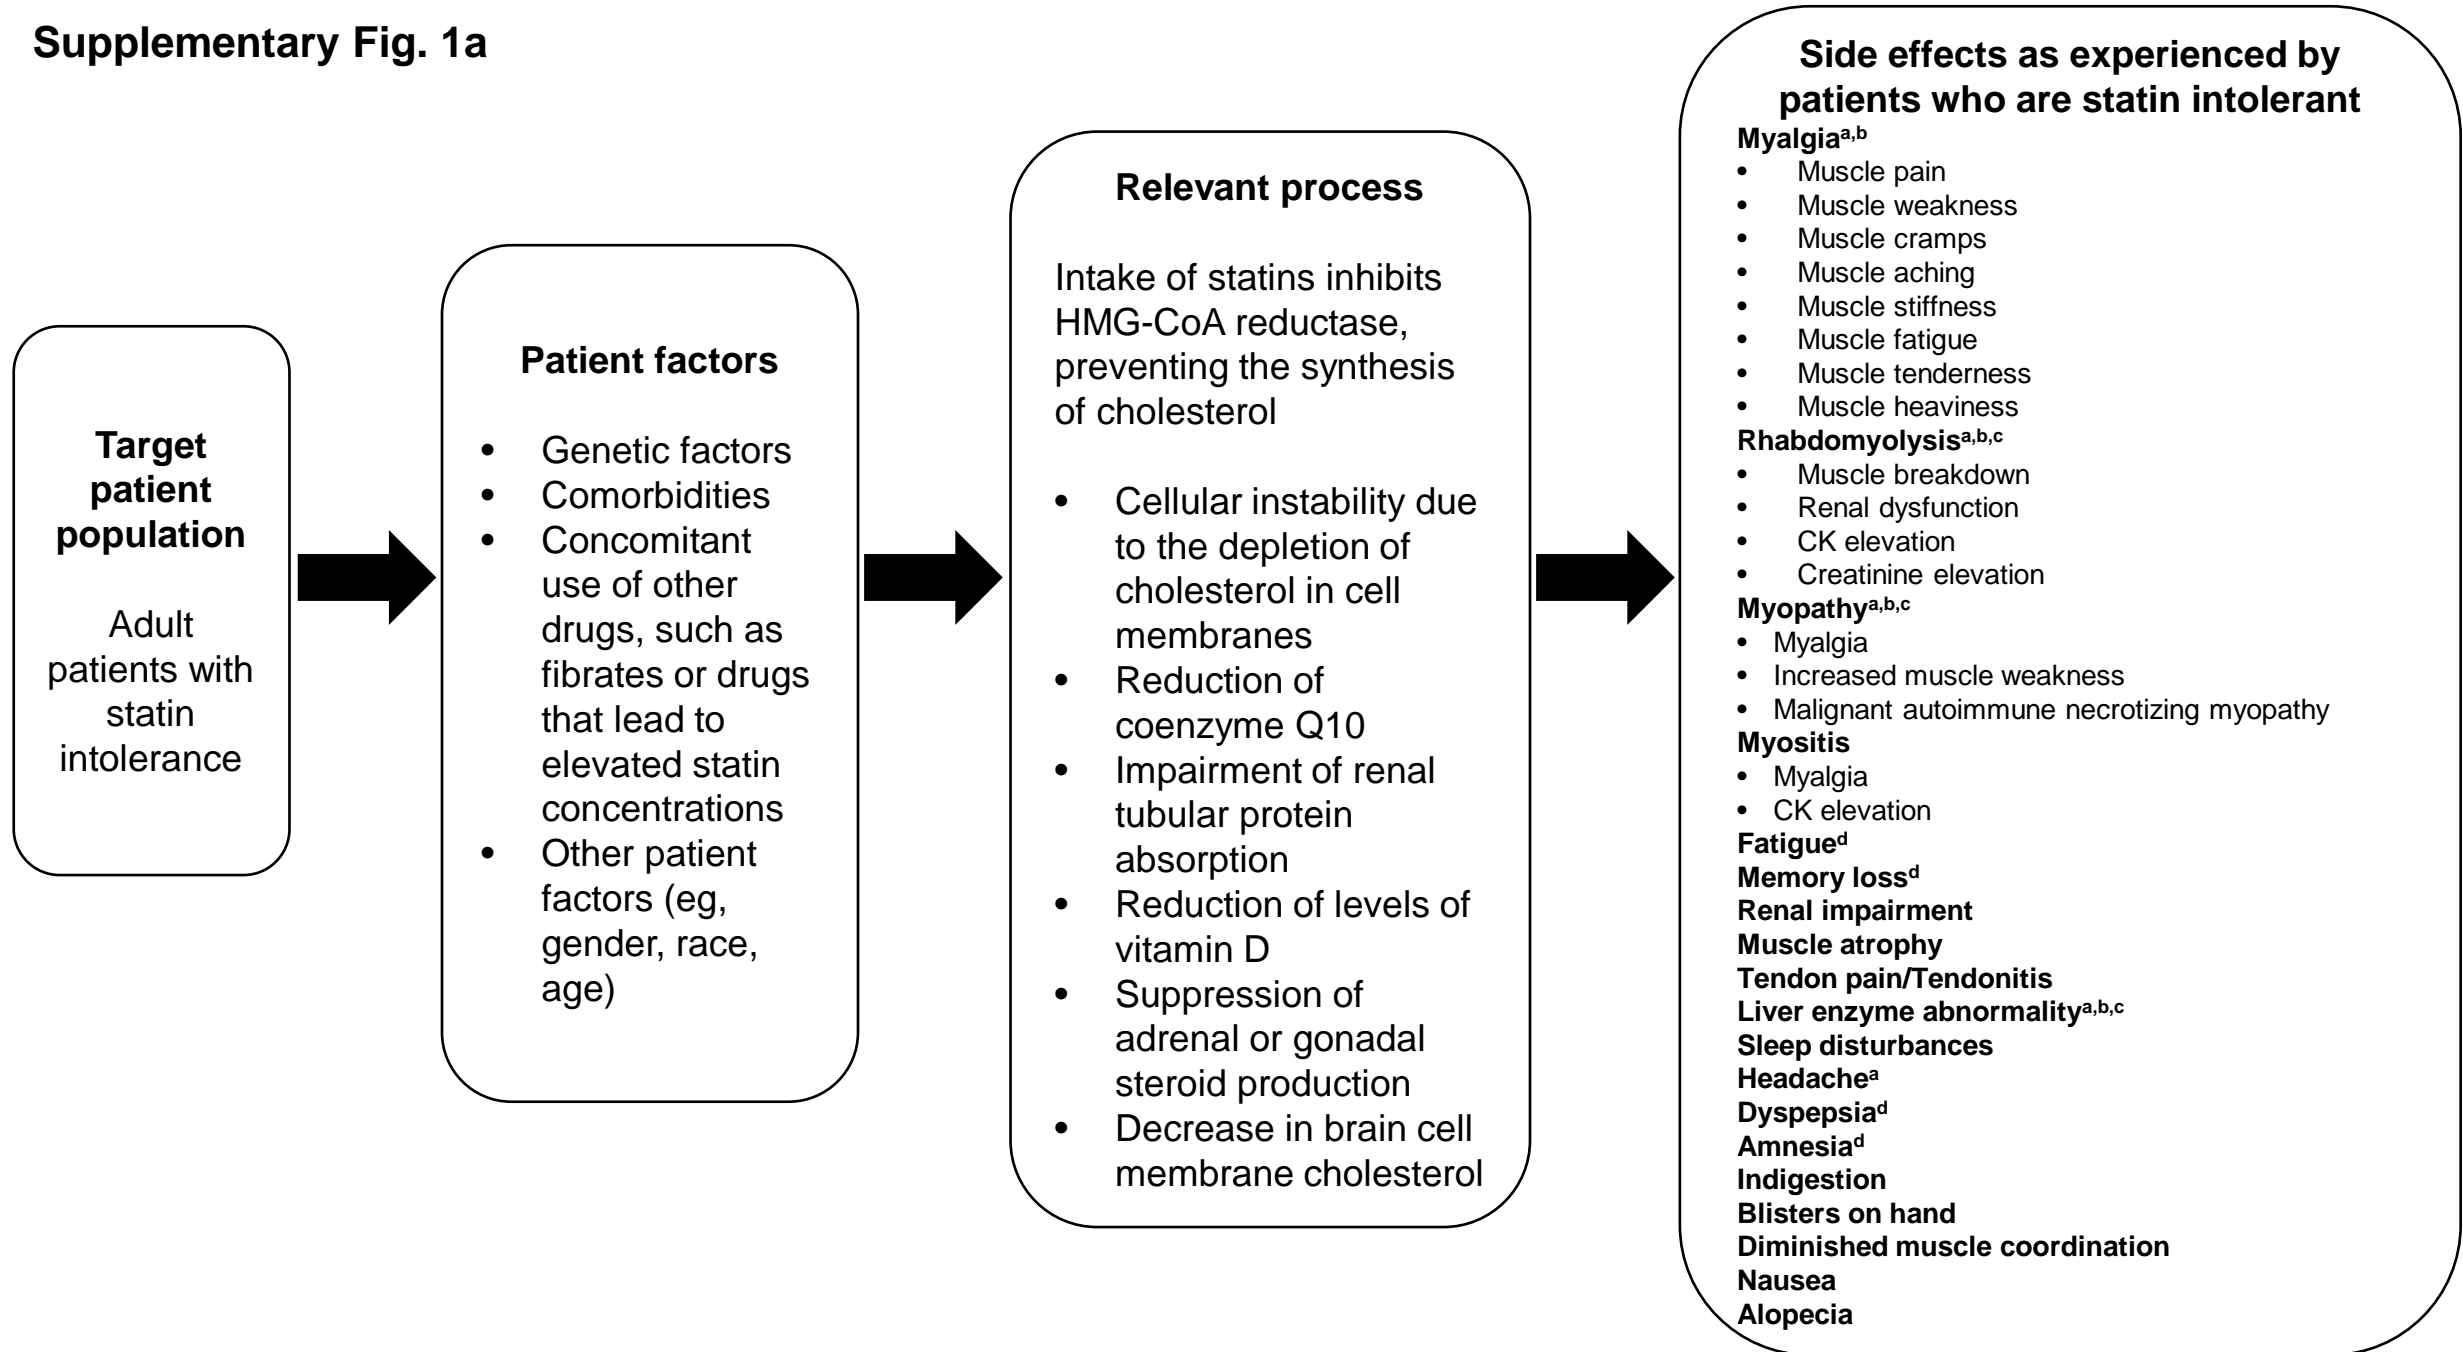

Supplement: 40271_2016_211_MOESM2_ESM.pdf [file 40271_2016_211_MOESM2_ESM.pdf]

**Supplementary Fig. 1b**

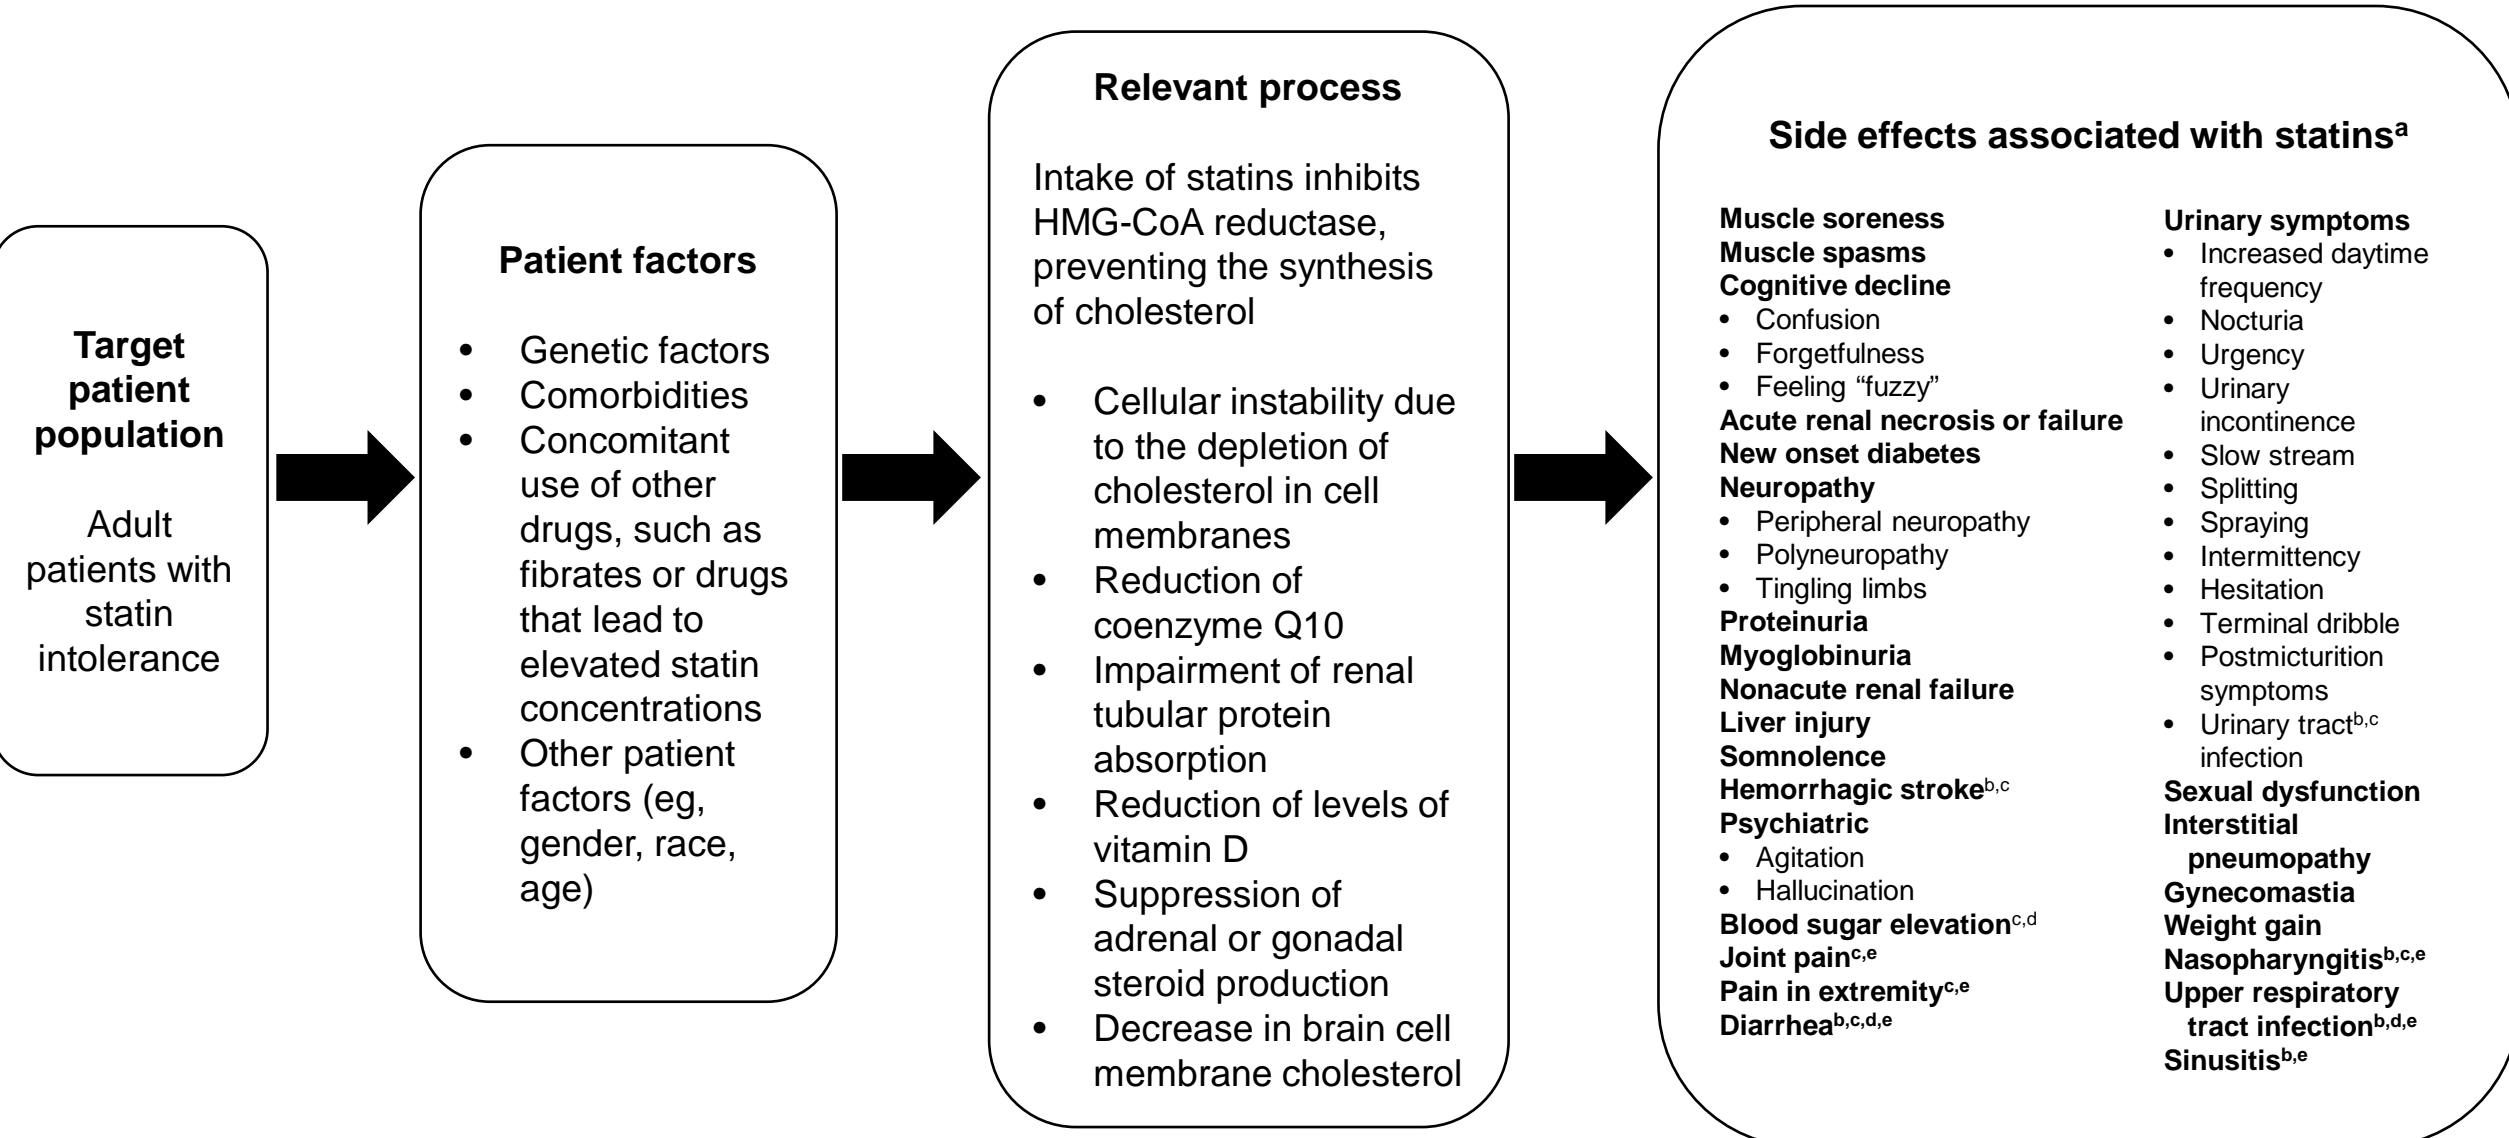

Supplement: 40271_2016_211_MOESM3_ESM.pdf [file 40271_2016_211_MOESM3_ESM.pdf]

Supplementary Fig. 2

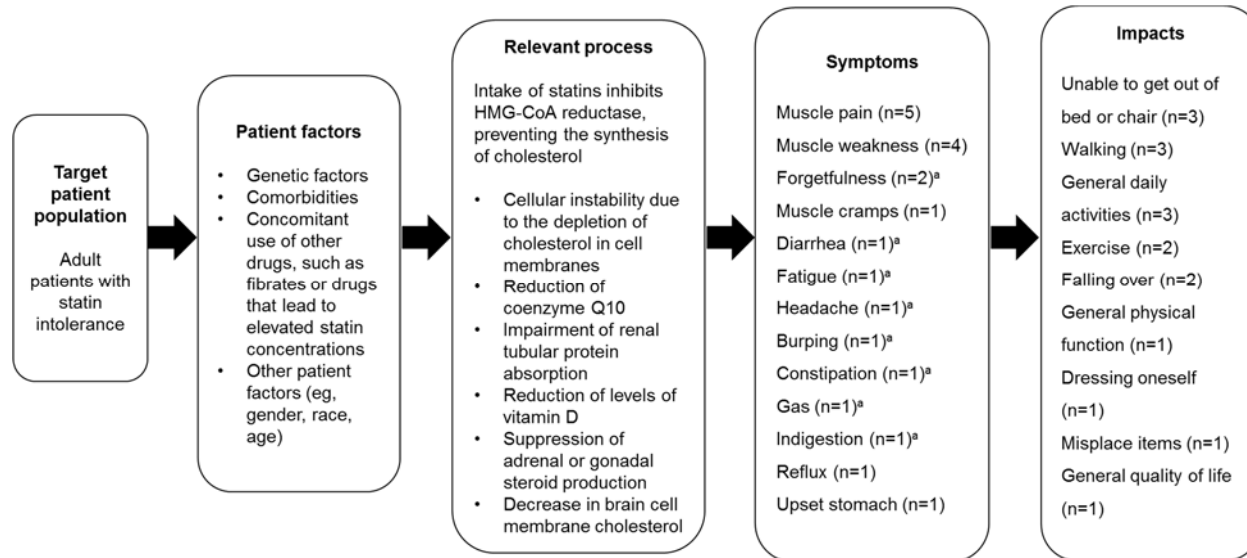

Supplement: 40271_2016_211_MOESM4_ESM.pdf [file 40271_2016_211_MOESM4_ESM.pdf]

Supplementary Fig. 3

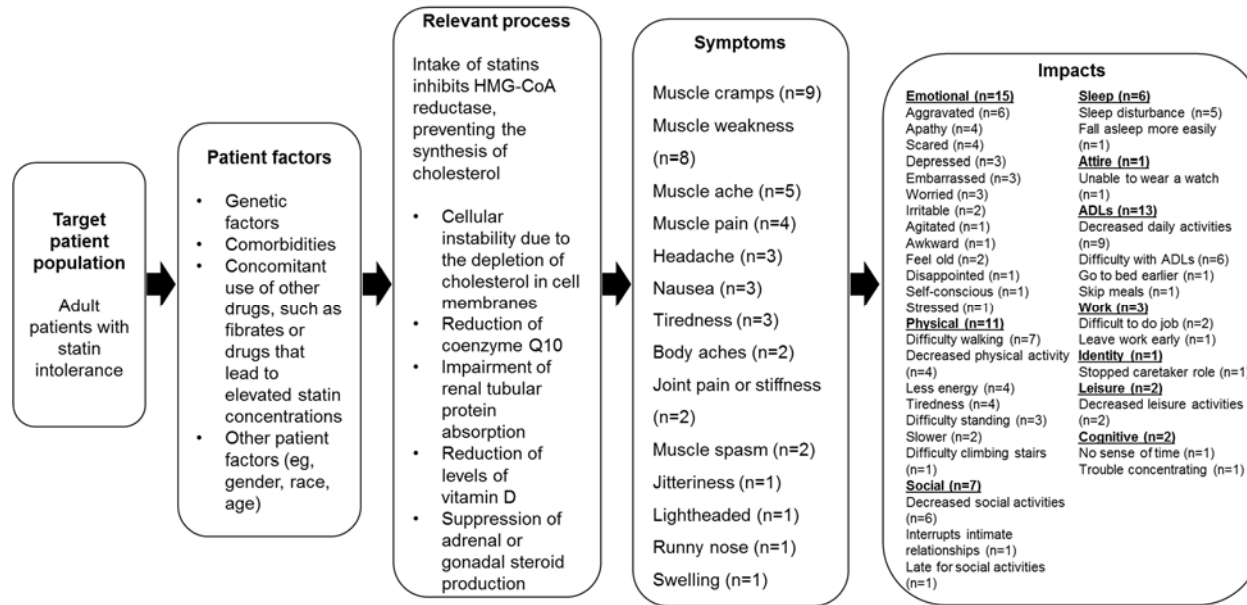

Supplement: 40271_2016_211_MOESM5_ESM.pdf [file 40271_2016_211_MOESM5_ESM.pdf]
